# The American Psychiatric Association Publishing Textbook of Forensic Psychiatry, Third Edition

Edited by Liza H. Gold, M.D., and Richard L. Frierson, M.D.

JUST PUBLISHED!

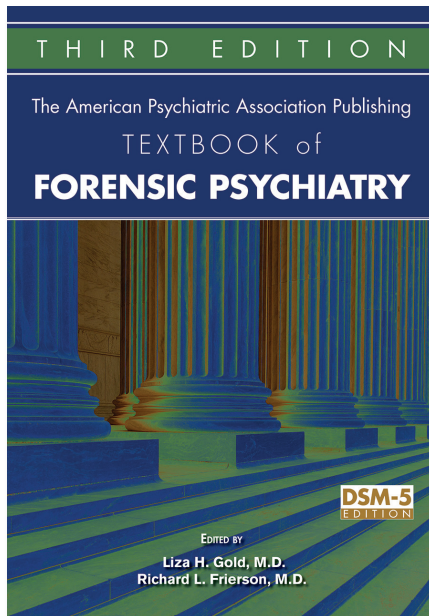

The new, third edition of *The American Psychiatric Association Publishing Textbook of Forensic Psychiatry*, now under the insightful leadership of Drs. Gold and Frierson, has undergone a major expansion and a comprehensive revision that reestablish it as the preeminent text in the field. No fewer than 10 new chapters have been added, and the entire book has been restructured to reflect the American Board of Psychiatry and Neurology's Content Outline for the Certification Examination in Forensic Psychiatry, thus facilitating its use in preparing for certification or maintaining certification.

In addition, the book constitutes a useful reference for general psychiatrists and psychologists interested in the legal issues that may impact clinical practice. The emphasis on Landmark Cases—as

fascinating as they are illuminating of critically important topics in case law—is highlighted in this edition, fostering understanding of the evolution of legal principles on the general practice of psychiatry and in the subspecialty of forensic psychiatry.

Written by some of the foremost experts in the field and structured for optimal utility, *The American Psychiatric Association Publishing Textbook of Forensic Psychiatry* will play an indispensable role both in educating forensic psychiatry fellows and general psychiatry residents and in keeping experienced clinicians up-to-date.

2018 • 568 pages • ISBN 978-1-61537-067-2 • Hardcover • \$145.00 • Item #37067

2018 • 568 pages • ISBN 978-1-61537-146-4 • eBook • \$116.00 • Item #37146

AMERICAN  
PSYCHIATRIC  
ASSOCIATION  
PUBLISHING

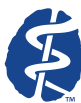

[www.appi.org](http://www.appi.org)

Email: [appi@psych.org](mailto:appi@psych.org)

Toll Free: 1-800-368-5777

20% Discount for American Psychiatric Association Members  
25% Discount for APA Resident-Fellow Members

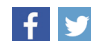

Priority Code AH1743

# Subscribe today to the highest ranked mental health journal in the Health Policy & Services category!\*

## ▶ Don't miss the December issue:

- When will telepsychiatry reach its tipping point?
- A consumer survey on discontinuing psychiatric medications
- Reducing hospital readmission with assertive hospital discharge planning
- Leveraging roles of community mental health workers and peer support specialists

## ▶ Coming in the January issue:

- A meta-analysis on effectiveness of mental health courts in reducing recidivism
- Mammography among women with severe mental illness
- Fentanyl and the evolving opioid epidemic: strategies for policy makers

## ▶ One low price covers your print and online subscription.

\$121 APA Member print and online subscription

\$110 APA Member online-only subscription

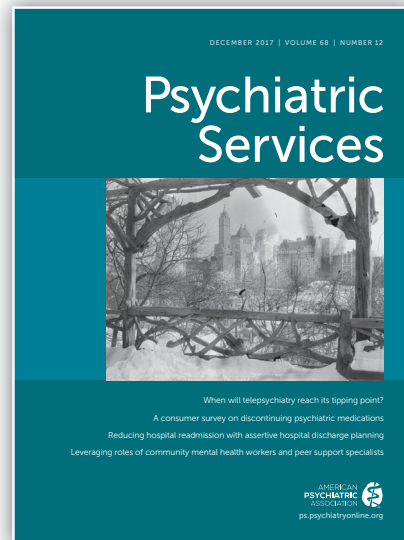

**PSYCHIATRIC  
SERVICES**  
FROM PAGES  
TO PRACTICE

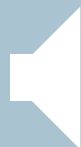

Listen to our podcast,  
***Psychiatric Services From Pages to Practice!***

Follow us on Twitter: @APAPubPsychSvcs

Sign up for alerts about new online content: <http://appi.org/etocs>

[ps.psychiatryonline.org](http://ps.psychiatryonline.org)

**Subscribe today at [www.appi.org](http://www.appi.org) or call  
Customer Service at 1-800-368-5777.**

\*By its most recent Impact Factor (2.888), *Psychiatric Services* is the highest ranked mental health services journal in the Health Policy & Services Category of ISI's Journal Citation Reports. Of the 77 peer-reviewed journals included in the Health Policy & Services Category, *Psychiatric Services* ranks 8th.

AMERICAN  
PSYCHIATRIC  
ASSOCIATION  
PUBLISHING

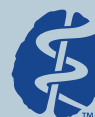

[www.appi.org](http://www.appi.org)

# American Psychiatric Association Publishing Textbook of Psychopharmacology, Fifth Edition

Edited by Alan F. Schatzberg, M.D., and  
Charles B. Nemeroff, M.D., Ph.D.

The *American Psychiatric Association Publishing Textbook of Psychopharmacology* is an indispensable and comprehensive resource for clinicians and trainees who prescribe psychotropic medications. Updated to reflect the new DSM-5 classification, this revised Fifth Edition maintains the user-friendly structure of its predecessors while offering in-depth coverage of the latest research in pharmacological principles, classes of drugs, and psychiatric disorders.

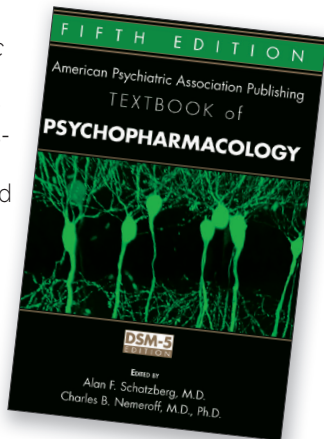

Introductory chapters provide a theoretical grounding in clinical applications, with topics ranging from neurotransmitters to brain imaging in psychopharmacology. The bulk of the book is devoted to various classes of drugs with each class divided into chapters on specific drugs—either new or revised to include the latest findings and trends. Finally, the section on psychopharmacological treatment addresses evidence-based principles of clinical care for the full spectrum of mental disorders and conditions—from depression to chronic pain—as well as for specific populations and circumstances—offering information on topics such as medication selection, combination and maintenance dosing regimens, monitoring and management of side effects, and strategies for optimizing treatment response.

The *American Psychiatric Association Publishing Textbook of Psychopharmacology* provides state-of-the-art information on both the principles and the practice of psychopharmacological treatment of psychiatric disorders.

2017 • 1,823 pages • ISBN 978-1-58562-523-9 • Hardcover • \$299.00 • Item #62523

2017 • 1,823 pages • ISBN 978-1-61537-122-8 • eBook • \$240.00 • Item #37122

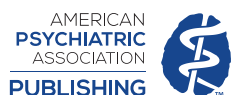

www.appi.org  
Phone: 703-907-7322  
Toll Free: 1-800-368-5777  
Email: appi@psych.org

20% Discount • American Psychiatric Association Members  
25% Discount • APA Resident-Fellow Members

AH1718

NYC  
HEALTH+  
HOSPITALS

Jacobi | North Central Bronx

## Psychiatrist Opportunities in NYC!

**Jacobi Medical Center (JMC)** is a modern, state-of-the-art, Level 1 Trauma Center located in an attractive and safe residential Bronx neighborhood just 20 minutes north of Manhattan. It is a North Bronx Healthcare Network hospital affiliated with North Central Bronx Hospital and a teaching site and academic affiliate of the Albert Einstein College of Medicine. It offers a full continuum of Acute Care Inpatient and Outpatient services in diverse Medical and Surgical Specialties, including Psychiatry. The Department of Psychiatry has 89 Adult Acute Inpatient beds, a Comprehensive Psychiatric Emergency Program (CPEP), a Consultation-Liaison Service, an Adult Ambulatory Practice, and a Community-Based Assertive Community Treatment Program. The department employs evidenced-based best practices in providing the highest quality care to its patients, in a patient-centered approach that is respectful of their individuality, culture, and community.

**North Central Bronx Hospital (NCB)** is a modern, state-of-the-art community hospital located in an attractive and safe residential Bronx neighborhood just 20 minutes north of Manhattan. It is a North Bronx Healthcare Network hospital affiliated with Jacobi Medical Center and a teaching site and academic affiliate of the Albert Einstein College of Medicine. It offers a full continuum of acute care inpatient and outpatient services in diverse Medical and Surgical specialties, including Psychiatry. The NCBH Department of Psychiatry has 70 Adult and Geriatric Acute Inpatient Beds, a Partial Hospital Program, Psychiatric Emergency Consultation-Liaison Service, an Adult Ambulatory Practice, and a community-based Assertive Community Treatment Program. The department employs evidenced-based best practices in providing the highest quality care to its patients, in a patient-centered approach that is respectful of their individuality, culture, and community.

**Jacobi Medical Center & North Central Bronx Hospital** are currently accepting applications and referrals for the following opportunities:

- Inpatient Attendings (JMC and NCB)
- Attending Psychiatrists ER at CPEP at JMC
- Director of ER (CPEP) - JMC
- Inpatient Unit Chief (JMC)
- Moonlighting opportunities also available! (JMC and NCB)

An academic appointment at Albert Einstein College of Medicine is offered. We offer a generous income package along with outstanding benefits, opportunities for advancement, retirement plan, malpractice, and much more!!

For immediate confidential consideration, please contact:  
Carmen Velez – Office of Physician Recruitment:  
Email: velezc@pagny.org Phone: 646-494-7559

<https://jobs.pagny.org/>

Physician Affiliate Group of New York [PAGNY] is comprised of over 3,600 physicians and healthcare professionals who provide services to NYC Health + Hospital, the largest public healthcare system in the United States. Our practitioners are highly skilled professionals with outstanding credentials who deliver the highest level of quality healthcare to patients throughout New York City.

EOE M/F/D/V

## Outpatient Adult Psychiatrists

### Minnesota

*Share your expertise in an environment that supports new treatments and innovation while embracing a strong work-life balance.*

HealthPartners is a dynamic multi-specialty medical group practice headquartered in the Twin Cities of Minneapolis/St. Paul, Minnesota. Our Behavioral Health group has a large outpatient practice with 21 adult psychiatrists, 4 child psychiatrists, 7 clinical nurse specialists and 60 therapists. Each has special interests and expertise, but also practice as generalists to provide outstanding clinical care to our diverse patient population via **integrated outpatient services** with our primary care and specialty clinics.

We have exciting practice opportunities for outpatient adult psychiatrists, and provide:

- Full-time and part-time practices
- Competitive pay
- A generous benefits package, including relocation assistance, employer-matched 401(k) and 457(b), malpractice coverage, and competitive PTO and CME
- Minimal call requirements (by pager/phone) covering outpatient practice
- Affiliation with multiple hospitals and clinics including inpatient psychiatry, intensive day programs, chemical dependency programs, and eating disorder programs
- A large internal referral base
- Exceptional nursing support and psychotherapy colleagues
- An organizational commitment to a sustainable medical practice with EHR, documentation efficiency work group, extensive billing and coding support, integrated services and telemedicine

HealthPartners' integrated health care system is recognized locally and nationally for great care and leadership. We believe outstanding health care is delivered when we merge the science of medicine with the compassion, spirit and humanity of our hearts. We refer to this as "**Head + Heart, Together,**" which exists to inspire constant improvement and lasting success. We achieve this by partnering with patients and families in everything from care decisions to service and facility design. As we work together as a unified team, we engage patients, families and the community, and put them at the center of everything we do.

To learn more and apply, visit us online at [healthpartners.com/careers](http://healthpartners.com/careers), or email your CV and cover letter to [lori.m.fake@healthpartners.com](mailto:lori.m.fake@healthpartners.com).

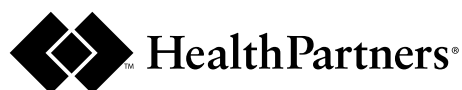

We are an equal opportunity employer and all qualified applicants will receive consideration for employment without regard to race, color, religion, sex, national origin, disability status, protected veteran status, or any other characteristic protected by law.

[healthpartners.com](http://healthpartners.com)

## Psychiatrist Opportunities Philadelphia, PA

Einstein Behavioral Health is a comprehensive treatment facility in Philadelphia, Pennsylvania. We are seeking:

- FT Psychiatrist for General Adult Inpatient Psychiatry Unit
- Geropsychiatrist
- CRC Medical Director

Our programs offer a full range of adult inpatient mental health services, including an alcohol and chemical dependency treatment unit and a geriatric diagnostic center. Our full continuum of care also includes intensive outpatient programs, partial hospitalization programs and an outpatient medication management clinic.

This opportunity includes an innovative, competitive compensation model and an excellent working environment as a member of a large, experienced behavioral medicine team.

Einstein Behavioral Health offers programs to address behavioral health issues for all ages. Our 36-bed Long Term Structured Residence (LTSR) services both adults and older adults, and our Adult Crisis Response Center (CRC) is a crisis/emergency psychiatry facility. Our Child and Adolescent Crisis Response Center includes a full range of services for children and adolescents.

We are part of Einstein Healthcare Network, a large, comprehensive healthcare network, and have a long history of providing excellent patient care and a high level of physician satisfaction.

For more information, please contact  
**Kim Hannan, Physician Recruiter,**  
[HannanKi@einstein.edu](mailto:HannanKi@einstein.edu) or call  
**267-421-7435.**

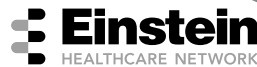

EOE

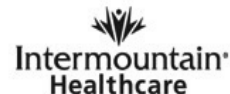

*Helping People Live the Healthiest Lives Possible.*

**Psychiatrists (adult and child), &  
Emergency-Access Center are currently needed in:**

Bountiful • Ogden • Park City • Provo  
Salt Lake City • St. George

**Medical Director/Department Chair &  
Emergency-Access Center needed in:**

Salt Lake City

Employment with Intermountain Medical Group. Competitive salary with transition to production and additional income for meeting quality goals. Stipend available. Signing bonus and loan repayment available. Full Intermountain benefits to include defined pension, 401k match & CME. Relocation provided up to 15K.

For the second year in a row, Forbes magazine has named Intermountain one of the top 3 healthcare organizations, a top 25 employer overall.

Contact Intermountain Physician Recruiting.  
800-888-3134 [PhysicianRecruit@imail.org](mailto:PhysicianRecruit@imail.org)  
<http://physicianjobsintermountain.org>

**Statement of Ownership, Management, and Circulation**  
**PS Form 3526 (All Periodicals Publications Except Requester Publications)**

|                                                                                                                                                                                                                                                                                                                                                                                                                                                                                                                                                                         |                                              |                                                                                    |                                                               |                              |
|-------------------------------------------------------------------------------------------------------------------------------------------------------------------------------------------------------------------------------------------------------------------------------------------------------------------------------------------------------------------------------------------------------------------------------------------------------------------------------------------------------------------------------------------------------------------------|----------------------------------------------|------------------------------------------------------------------------------------|---------------------------------------------------------------|------------------------------|
| 1. Publication Title<br>AMERICAN PSYCHIATRIC ASSOCIATION/<br>AMERICAN JOURNAL OF PSYCHIATRY<br>(THE)                                                                                                                                                                                                                                                                                                                                                                                                                                                                    |                                              | 2. Publication Number<br>20200                                                     | ISSN<br>29530                                                 | 3. Filing Date<br>09/13/2017 |
| 4. Issue Frequency<br>MONTHLY                                                                                                                                                                                                                                                                                                                                                                                                                                                                                                                                           | 5. Number of Issues Published Annually<br>12 | 6. Annual Subscription Price<br>\$ 288.00                                          |                                                               |                              |
| 7. Complete Mailing Address of Known Office of Publication<br>1000 WILSON BLVD STE 1825<br>ARLINGTON, VA 22209-3924                                                                                                                                                                                                                                                                                                                                                                                                                                                     |                                              |                                                                                    | Contact Person<br>ROGER DOMRAS<br>Telephone<br>(703) 907-8544 |                              |
| 8. Complete Mailing Address of Headquarters or General Business Office of Publisher<br>1000 Wilson Blvd., Ste. 1825<br>Arlington, VA 22209-3924                                                                                                                                                                                                                                                                                                                                                                                                                         |                                              |                                                                                    |                                                               |                              |
| 9. Full Names and Complete Mailing Addresses of Publisher, Editor, and Managing Editor                                                                                                                                                                                                                                                                                                                                                                                                                                                                                  |                                              |                                                                                    |                                                               |                              |
| Publisher (Name and complete mailing address)<br>John McDuffie<br>1000 Wilson Blvd., Ste. 1825<br>Arlington, VA 22209-3924                                                                                                                                                                                                                                                                                                                                                                                                                                              |                                              |                                                                                    |                                                               |                              |
| Editor (Name and complete mailing address)<br>Robert Freedman, M.D.<br>1000 Wilson Blvd., Ste. 1825<br>Arlington, VA 22209-3924                                                                                                                                                                                                                                                                                                                                                                                                                                         |                                              |                                                                                    |                                                               |                              |
| Managing Editor (Name and complete mailing address)<br>Michael Roy<br>1000 Wilson Blvd., Ste. 1825<br>Arlington, VA 22209-3924                                                                                                                                                                                                                                                                                                                                                                                                                                          |                                              |                                                                                    |                                                               |                              |
| 10. Owner (Do not leave blank. If the publication is owned by a corporation, give the name and address of the corporation immediately followed by the names and addresses of all stockholders owning or holding 1 percent or more of the total amount of stock. If not owned by a corporation, give names and addresses of the individual owners. If owned by a partnership or other unincorporated firm, give its name and address as well as those of each individual owner. If the publication is published by a nonprofit organization, give its name and address.) |                                              |                                                                                    |                                                               |                              |
| Full Name<br>American Psychiatric Assoc.                                                                                                                                                                                                                                                                                                                                                                                                                                                                                                                                |                                              | Complete Mailing Address<br>1000 Wilson Blvd., Ste. 1825, Arlington, VA 22209-3924 |                                                               |                              |
| 11. Known Bondholders, Mortgagees, and Other Security Holders Owning or Holding 1 Percent or More of Total Amount of Bonds, Mortgages, or Other Securities. If none, check box <input checked="" type="checkbox"/> None                                                                                                                                                                                                                                                                                                                                                 |                                              |                                                                                    |                                                               |                              |
| Full Name                                                                                                                                                                                                                                                                                                                                                                                                                                                                                                                                                               |                                              | Complete Mailing Address                                                           |                                                               |                              |

PS Form 3526, September 2007 (Page 1) PRIVACY NOTICE: See our privacy policy on www.usps.com

|                                                                                                   |                                                                                                                                                                    |                                                             |                                                                |
|---------------------------------------------------------------------------------------------------|--------------------------------------------------------------------------------------------------------------------------------------------------------------------|-------------------------------------------------------------|----------------------------------------------------------------|
| 13. Publication Title<br>AMERICAN PSYCHIATRIC ASSOCIATION/AMERICAN JOURNAL<br>OF PSYCHIATRY (THE) |                                                                                                                                                                    | 14. Issue Date for Circulation Data Below<br>09/01/2017     |                                                                |
| 15. Extend and Nature of Circulation                                                              |                                                                                                                                                                    | Average No. Copies Each Issue<br>During Preceding 12 Months | No. Copies of Single Issue<br>Published Nearest to Filing Date |
| a. Total Numbers of Copies (Net press run)                                                        |                                                                                                                                                                    | 29438                                                       | 28024                                                          |
| b. Paid Circulation (By Mail and Outside the Mail)                                                | (1) Mailed Outside County Paid Subscriptions Stated on PS Form 3541 (include paid distribution above nominal rate, advertiser's proof copies, and exchange copies) | 26558                                                       | 25741                                                          |
|                                                                                                   | (2) Mailed In-County Paid Subscriptions Stated on PS Form 3541 (include paid distribution above nominal rate, advertiser's proof copies, and exchange copies)      | 0                                                           | 0                                                              |
|                                                                                                   | (3) Paid Distribution Outside the Mails Including Sales Through Dealers and Carriers, Street Vendors, Counter Sales, and Other Paid Distribution Outside USPS      | 2168                                                        | 2057                                                           |
|                                                                                                   | (4) Paid Distribution by Other Classes of Mail Through the USPS (e.g. First-Class Mail)                                                                            | 0                                                           | 0                                                              |
| c. Total Paid Distribution (Sum of 15b (1), (2), (3), (4))                                        |                                                                                                                                                                    | 28726                                                       | 27798                                                          |
| d. Free or Nominal Rate Distribution (By Mail and Outside the Mail)                               | (1) Free or Nominal Rate Outside County Copies included on PS Form 3541                                                                                            | 140                                                         | 126                                                            |
|                                                                                                   | (2) Free or Nominal Rate In-County Copies included on PS Form 3541                                                                                                 | 0                                                           | 0                                                              |
|                                                                                                   | (3) Free or Nominal Rate Copies Mailed at Other Classes Through the USPS (e.g. First-Class Mail)                                                                   | 0                                                           | 0                                                              |
|                                                                                                   | (4) Free or Nominal Rate Distribution Outside the Mail (Carriers or other means)                                                                                   | 100                                                         | 100                                                            |
| e. Total Free or Nominal Rate Distribution (Sum of 15d (1), (2), (3), (4))                        |                                                                                                                                                                    | 240                                                         | 226                                                            |
| f. Total Distribution (Sum of 15c and 15e)                                                        |                                                                                                                                                                    | 28966                                                       | 28024                                                          |
| g. Copies not Distributed                                                                         |                                                                                                                                                                    | 0                                                           | 0                                                              |
| h. Total (Sum of 15f and 15g)                                                                     |                                                                                                                                                                    | 28966                                                       | 28024                                                          |
| i. Percent Paid ((15c / 15f) times 100)                                                           |                                                                                                                                                                    | 99.17 %                                                     | 99.19 %                                                        |
| 16. If total circulation includes electronic copies, report that circulation on lines below.      |                                                                                                                                                                    |                                                             |                                                                |
| a. Paid Electronic Copies                                                                         |                                                                                                                                                                    | 0                                                           | 0                                                              |
| b. Total Paid Print Copies (Line 15c) + Paid Electronic Copies                                    |                                                                                                                                                                    | 0                                                           | 0                                                              |
| c. Total Print Distribution (Line 15f) + Paid Electronic Copies                                   |                                                                                                                                                                    | 0                                                           | 0                                                              |
| d. Percent Paid (Both Print and Electronic Copies)                                                |                                                                                                                                                                    | 0.00 %                                                      | 0.00 %                                                         |

I certify that 50% of all my distributed copies (Electronic and Print) are paid above a nominal price.

17. Publication of Statement of Ownership  
 If the publication is a general publication, publication of this statement is required. Will be printed in the 11/01/2017 issue of this publication.  Publication not required.

|                                                                          |                                    |                        |
|--------------------------------------------------------------------------|------------------------------------|------------------------|
| 18. Signature and Title of Editor, Publisher, Business Manager, or Owner | Title                              | Date                   |
| Debra Eubanks                                                            | Dir. Finance Publishing Operations | 09/13/2017 14:45:47 PM |

I certify that all information furnished on this form is true and complete. I understand that anyone who furnishes false or misleading information on this form or who omits material or information requested on the form may be subject to criminal sanctions (including fines and imprisonment) and civil sanctions (including civil penalties).

PS Form 3526, September 2007 (Page 2) PRIVACY NOTICE: See our privacy policy on www.usps.com

## ACUTE Center for Eating Disorders Denver Health

The ACUTE Center for Eating Disorders at Denver Health in Denver, Colorado, the nation's original and premier medical stabilization unit for those eating disordered patients suffering from the most extreme forms of the disease, is for the first time ever recruiting a **full-time psychiatrist** to work on this unit. ACUTE has just moved into a brand new 30 bed ICU-type unit due the ongoing increasing demands for this unique service. The person selected for this new position will be a member of the medical staff at Denver Health with an academic appointment at the University of Colorado School of Medicine commiserate with skills and academic experience.

In addition there is a tremendous opportunity for funded and investigator research with this extremely ill patient population. Successful candidate would be working on a multidisciplinary team, including Dr. Philip S. Mehler, Founder of ACUTE, and Dr. Margherita Mascolo, Medical Director of ACUTE.

**Interested parties should send their CV to:**  
[Lawren.McBride@DHHA.org](mailto:Lawren.McBride@DHHA.org)

## The Art and Science of Brief Psychotherapies A Practitioner's Guide, Third Edition

Edited by Mantosh J. Dewan, M.D.,  
Brett N. Steenbarger, Ph.D., and Roger P. Greenberg, Ph.D.

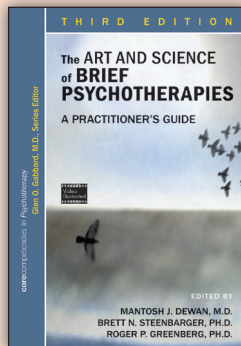

**Just Published!** Video Illustrated

Each chapter is thoroughly updated, and new chapters cover such topics as dialectical behavior therapy, multicultural practice, and mentalizing, as well as fresh approaches to intervention, such as telepsychiatry and Internet-based interventions.

2018 • 397 pages • ISBN 978-1-61537-079-5 • Paperback • \$87.00 • Item #37079

2018 • 397 pages • ISBN 978-1-61537-151-8 • eBook • \$70.00 • Item #37151

**AMERICAN  
PSYCHIATRIC  
ASSOCIATION  
PUBLISHING**

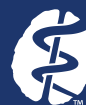

www.appi.org  
Email: appi@psych.org  
Phone: 1-800-368-5777

AH1744A

## Subscription and Business Information

*The American Journal of Psychiatry*, ISSN 0002-953X, is published monthly by the American Psychiatric Association.

The American Psychiatric Association does not hold itself responsible for statements made in its publications by contributors or advertisers. Unless so stated, material in *The American Journal of Psychiatry* does not reflect the endorsement, official attitude, or position of the American Psychiatric Association or of the Journal's Editorial Board.

Periodicals postage paid at Arlington, VA, and additional mailing offices. POSTMASTER: Send address changes to *The American Journal of Psychiatry*, Circulation Department, American Psychiatric Association, 1000 Wilson Blvd., Suite 1825, Arlington, VA 22209-3901.

### Editorial Office

*American Journal of Psychiatry*  
American Psychiatric Association  
1000 Wilson Blvd., Suite 1825  
Arlington, VA 22209-3901  
Phone: (703) 907-7885, (703) 907-7889  
E-mail: [ajp@psych.org](mailto:ajp@psych.org)

### Customer Service

Phone: (800) 368-5777 (toll-free)  
E-mail: [appi@psych.org](mailto:appi@psych.org)

### APA Member Subscription Services

Phone: (888) 35-PSYCH (toll-free)

### Subscriptions

Per year: individual \$318.00,  
international \$478.00

Institutional subscriptions are tier priced. For institutional site license or pricing information, contact (703) 907-8538 or [institutions@psych.org](mailto:institutions@psych.org).

*Additional subscription options, including single issues and student rates*

Contact Customer Service

### Advertising

*Pharmaceutical Print and Online Advertising*  
Frank Cox, Kathleen Harrison, Tim Wolfinger  
Pharmaceutical Media, Inc.  
30 East 33rd Street  
New York, NY 10016  
Phone: (212) 904-0379  
E-mail: [twolfinger@pminy.com](mailto:twolfinger@pminy.com)

*Nonpharmaceutical and Online Sales*

Eamon Wood  
Pharmaceutical Media, Inc.  
E-mail: [ewood@pminy.com](mailto:ewood@pminy.com)  
(see address and phone above).

### Permissions and Reprints

Material published in the journals of the American Psychiatric Association and American Psychiatric Association Publishing is protected by copyright and all rights are reserved. Material may not be reproduced in any form or by any means without written permission from the copyright owner. For permission to reproduce material published by APA, please visit [http://www.appi.org/Customer\\_Service/Pages/Permissions.aspx](http://www.appi.org/Customer_Service/Pages/Permissions.aspx) for more information. Permission can also be secured through the Copyright Clearance Center ([www.copyright.com](http://www.copyright.com)).

APA does not require that permission be obtained for the photocopying of isolated articles for nonprofit classroom or library reserve use; all fees associated with such permission are waived. This consent does not extend to other kinds of copying, such as copying for general distribution, for advertising or promotional purposes, for creating new collective works, or for resale. Requests for commercial distribution should be directed to (703) 907-7889.

For bulk reprints, please contact Jane Cha, (703) 907-7889; email: [jcha@psych.org](mailto:jcha@psych.org).

Indexed in Abstracts for Social Workers, Academic Abstracts, Biological Abstracts, Chemical Abstracts, Chicago Psychoanalytic Literature Index, Cumulative Index to Nursing Literature, Excerpta Medica, Hospital Literature Index, Index Medicus, International Nursing Index, Nutrition Abstracts, Psychological Abstracts, Science Citation Index, Social Science Source, and Social Sciences Index.

Pages are produced by Sheridan Journal Services (Waterbury, VT) and printed by Sheridan NH (Hanover, NH) on acid-free paper effective with Volume 169, Number 1, January 2012.

© 2017 American Psychiatric Association.

# Psychiatric Research and Clinical Practice

Edited by Kimberly A. Yonkers, M.D.

An Open-Access Journal From the American Psychiatric Association

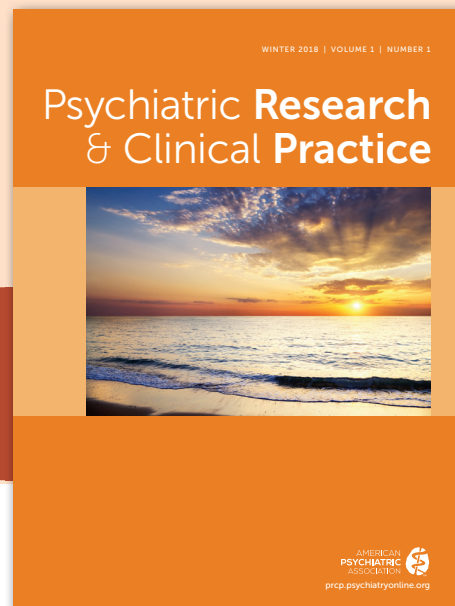

Psychiatric Research and Clinical Practice (PRCP) is a new peer-reviewed, open-access journal from the American Psychiatric Association that offers a high-profile publishing destination for peer-reviewed submissions that build upon the psychiatric knowledge base and bring research findings closer to clinical utility through deeper investigation.

Submissions on all aspects of mental and behavioral health to inform the field from bench to bedside are welcome. PRCP seeks to occupy that place between research and clinical utility, leaning toward clinical utility through publication of replication studies and features that show how new scientific knowledge can inform clinical practice. The journal will also feature “Clinical Pearls”—accounts by clinicians using the findings from the most up-to-date clinical research to help solve problems commonly confronted in clinical practice.

PRCP maintains the rigorous standards of APA’s scholarly publications while providing an essential resource for today’s practicing physicians. Published in accordance with open-access principles, PRCP makes all of its content immediately available for free—the reach one wants from an established and respected publisher.

Psychiatric Research and Clinical Practice is committed to keeping the field of psychiatry vibrant and relevant by publishing wide-ranging information on all aspects of mental and behavioral health and enhancing APA’s leadership role in scientific publishing in psychiatry by expanding the amount of research, clinical practice, and systems of care content available to the field.

## About the Editor

Kimberly A. Yonkers, M.D., is Professor of Psychiatry, Epidemiology, Obstetrics/Gynecology, and Reproductive Sciences and Director of the Center for Wellbeing of Women and Mothers at Yale University. She brings to the task of serving as PRCP’s Editor a broad and deep experience in research and clinical work. Her research includes investigations into the clinical course, etiopathology, and treatment of psychiatric disorders as they occur in women. A major component of this work includes investigations into the occurrence and treatment of illnesses in pregnancy and the postpartum period and across the menstrual cycle. This area, by its nature, cuts across disciplines and requires psychiatric expertise as well as knowledge in neuroscience and reproductive biology. Her work has also included determining optimal methods for screening and treating women for substance use problems when they are pregnant or postpartum.

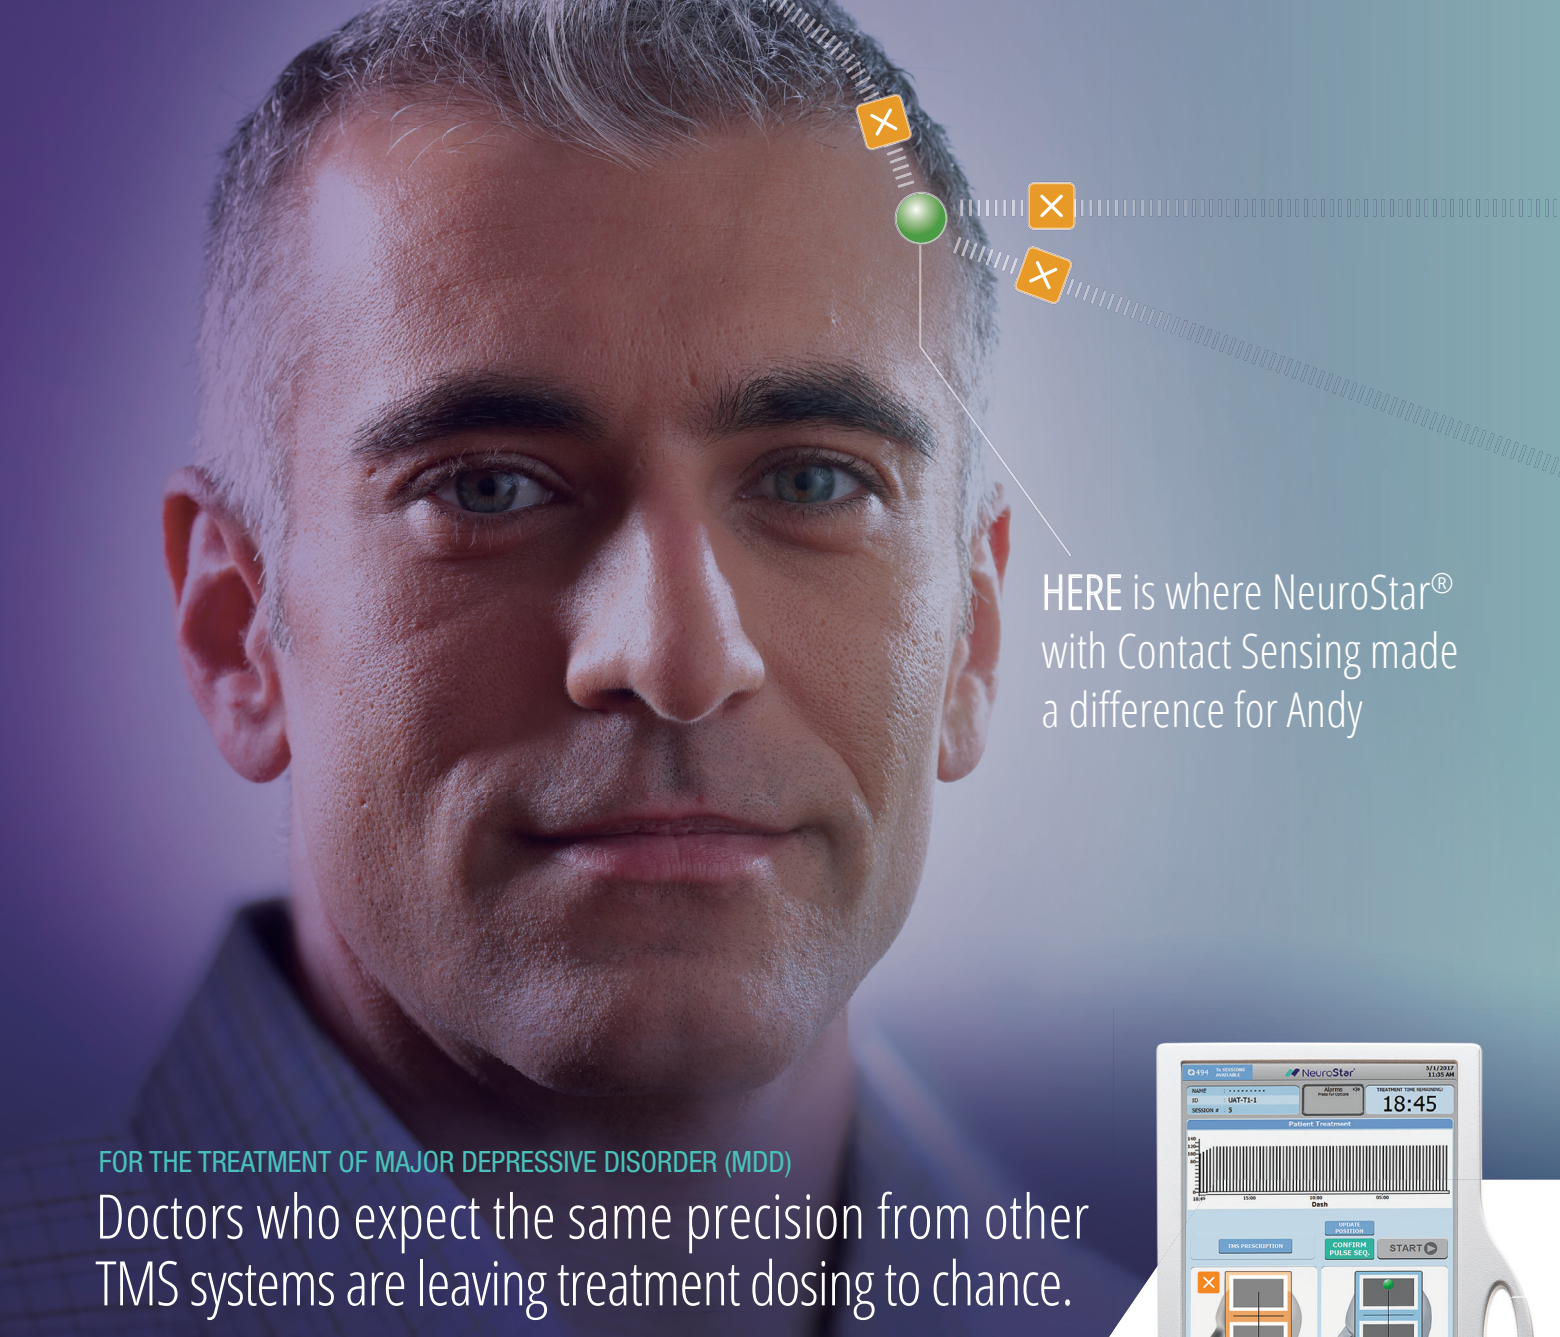

HERE is where NeuroStar® with Contact Sensing made a difference for Andy

**FOR THE TREATMENT OF MAJOR DEPRESSIVE DISORDER (MDD)**

Doctors who expect the same precision from other TMS systems are leaving treatment dosing to chance.

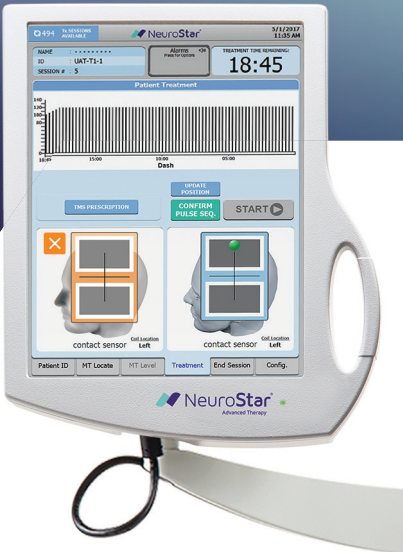

When contact with the head is off by just 1 mm, as much as a 40% loss in the prescribed TMS dose can occur.<sup>1</sup> **Only NeuroStar Advanced Therapy** with Contact Sensing precisely monitors treatment delivery in 3 dimensions and alerts the clinician if the coil loses contact, ensuring that the full dose is being administered.

**When remission from MDD is at stake, precision matters. Trust the #1 TMS choice of doctors like you.**

**INDICATION**

NeuroStar® is indicated for the treatment of Major Depressive Disorder in adult patients who have failed to receive satisfactory improvement from prior antidepressant medication in the current episode.

**IMPORTANT INFORMATION**

The most common side effect is pain or discomfort at or near the treatment site. These events are transient; they occur during the TMS treatment course

and do not occur for most patients after the first week of treatment. NeuroStar Advanced Therapy should not be used with patients who have non-removable conductive metal in or near the head.

NeuroStar Advanced Therapy is available by prescription only. Please visit [NeuroStar.com](http://NeuroStar.com) for full safety and prescribing information.

**Reference:** 1. Neuronetics, Inc., Data on file.

**NeuroStar.com**  
**1-877-600-7555**

**RIGHT DOSE. RIGHT LOCATION.**  
**EVERY TIME.**

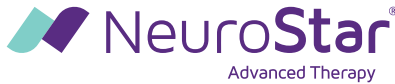

Source: http://ajp.psychiatryonline.org/doi/suppl/10.1176/ajp.2017.174.issue-12/suppl_file/back.pdf
