# The American Journal of Psychiatry

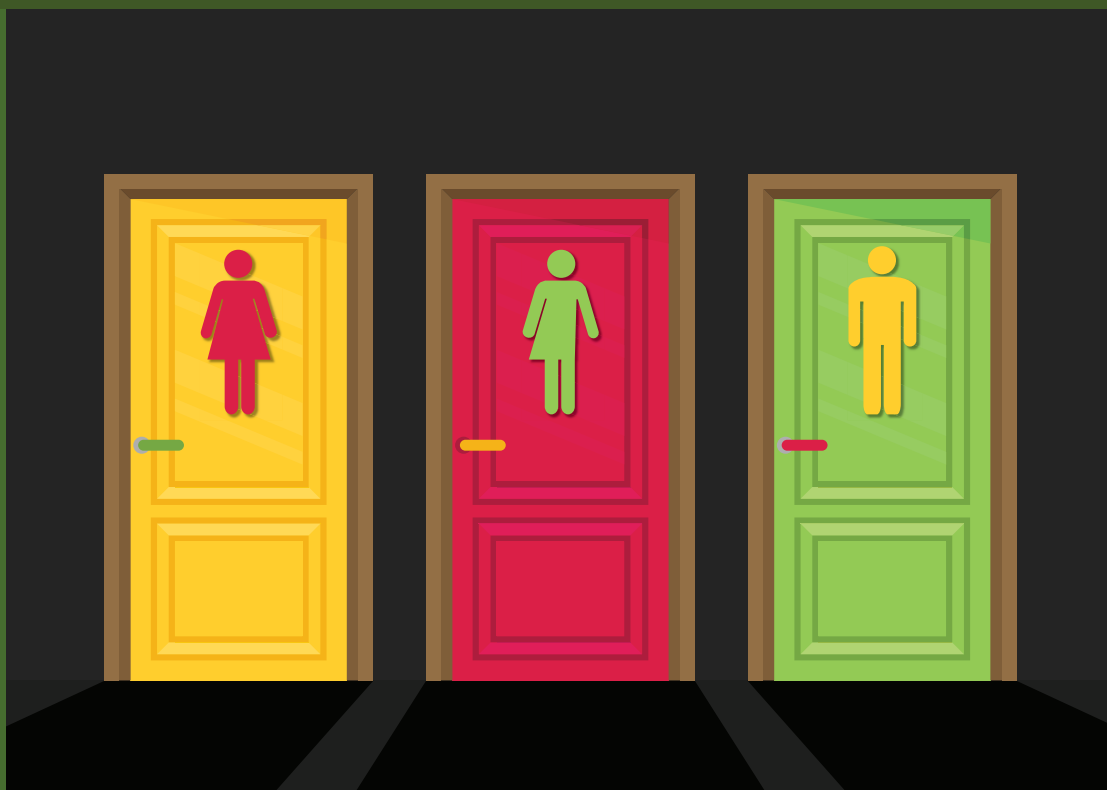

Transgender Research in the 21st Century: A Selective  
Critical Review From a Neurocognitive Perspective

Frontal Lobe Moderators and Mediators of Response to  
Exposure Therapy in PTSD

Association of a History of Child Abuse With Impaired  
Myelination in the Anterior Cingulate Cortex

The Role of Intrinsic Brain Functional Connectivity in  
Vulnerability and Resilience to Bipolar Disorder
