# We've got you covered.

For over 30 years, we have provided psychiatrists with exceptional protection and personalized service. We offer comprehensive insurance coverage and superior risk management support through an "A" rated carrier.

## ANNOUNCING NEW ENHANCEMENTS TO THE AMERICAN PSYCHIATRIC ASSOCIATION PSYCHIATRISTS' PROFESSIONAL LIABILITY PROGRAM:

- **Defense Expenses related to Licensing Board Hearings and Other Proceedings:** Increased Limit to \$50,000 per proceeding with NO annual aggregate (higher limits are available up to \$150,000)
- **Fire Legal Liability Coverage:** Limit of liability increased to \$150,000 for fire damage to third party property
- **Emergency Aid Coverage:** Reimbursement up to \$15,000 in costs and expenses for medical supplies
- Insured's **Consent to Settle** is now required in the settlement of any claim – No arbitration clause!
- **First Party Assault and Battery Coverage:** Up to \$25,000 reimbursement for medical expenses related to injuries and/or personal property damage caused by a patient or client
- **Medical Payments Coverage:** Increased limit to \$100,000 for Medical Payments to a patient or client arising from bodily injury on your business premises

## IN ADDITION WE CONTINUE TO OFFER THE FOLLOWING MULTIPLE PREMIUM DISCOUNTS:

- **50% Resident-Fellow Member Discount**
- **Up to 50% New Doctor Discount** (for those who qualify)
- **50% Part Time Discount** for up to 20 client hours a week or less
- **10% New Policyholder Discount** (must be claims free for the last 6 months)
- **15% Child and Adolescent Psychiatrist Discount** for those whose patient base is more than 50% Children and Adolescents
- **10% Claims Free Discount** for those practicing 10 years, after completion of training, and remain claims free
- **5% Risk Management Discount** for 3 hours of CME

*(Above Coverage Features and Discounts are subject to individual state approval)*

Visit us at [apamalpractice.com](http://apamalpractice.com) or call **877.740.1777** to learn more.

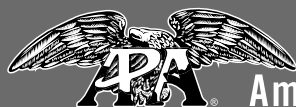

**American Professional Agency**

LEADERS IN PSYCHIATRIC MEDICAL LIABILITY INSURANCE

ENDORSED BY THE  
AMERICAN PSYCHIATRIC  
ASSOCIATION

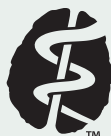

# The American Journal of Psychiatry

Official Journal of the American Psychiatric Association

## Officers 2017–2018

### President

Anita S. Everett, M.D.

### President-Elect

Altha J. Stewart, M.D.

### Treasurer

Bruce J. Schwartz, M.D.

### Secretary

Philip R. Muskin, M.D., M.A.

### Assembly

#### Speaker

Theresa M. Miskimen, M.D.

#### Speaker-Elect

James R. Batterson, M.D.

#### Recorder

Steven R. Daviss, M.D.

### Office of the CEO and Medical Director

#### CEO and Medical Director

Saul Levin, M.D., M.P.A.

### Board of Trustees

Jeffrey Akaka, M.D.

Lama Bazzi, M.D.

Renée L. Binder, M.D.

Jenny Boyer, M.D., Ph.D., J.D.

Ronald M. Burd, M.D.

Tanuja Gandhi, M.D.

Jeffrey L. Geller, M.D., M.P.H.

Uchenna B. Okoye, M.D., M.P.H.

Maria A. Oquendo, M.D., Ph.D.

Roger Peele, M.D.

Vivian B. Pender, M.D.

Paul Summergrad, M.D.

Richard F. Summers, M.D.

Ramaswamy Viswanathan, M.D., D.M.Sc.

Melinda Young, M.D.

## Editorial Board

### Editor

Robert Freedman, M.D.

### Deputy Editors

David A. Lewis, M.D.

Robert Michels, M.D.

Daniel S. Pine, M.D.

A. John Rush, M.D.

Susan K. Schultz, M.D.

Carol A. Tamminga, M.D.

### Associate Editors

Alan Brown, M.D., M.P.H.

Tyrone Cannon, Ph.D.

Benjamin G. Druss, M.D., M.P.H.

Felton Earls, M.D.

Graham J. Emslie, M.D.

Yasmin Hurd, Ph.D.

Joan L. Luby, M.D.

Constantine G. Lyketsos, M.D., M.H.S.

Helen S. Mayberg, M.D., F.R.C.P.C.

Terrie E. Moffitt, Ph.D.

Rajesh Narendran, M.D.

Roy Perlis, M.D.

Anita Thapar, M.B.B.Ch., F.R.C.Psych.,

Ph.D., F.Med.Sci.

Mauricio Tohen, M.D., Dr.PH., M.B.A.

Eduard Vieta, M.D., Ph.D.

Katherine L. Wisner, M.D., M.S.

Xin Yu, M.D.

### Editor Emerita

Nancy C. Andreasen, M.D., Ph.D.

### Former Editors

Amariah Brigham, M.D., 1844–1849

T. Romeyn Beck, M.D., 1849–1854

John P. Gray, M.D., 1854–1886

G. Alder Blumer, M.D., 1886–1894

Richard Dewey, M.D., 1894–1897

Henry M. Hurd, M.D., 1897–1904

Edward N. Brush, M.D., 1904–1931

Clarence B. Farrar, M.D., 1931–1965

Francis J. Braceland, M.D., 1965–1978

John C. Nemiah, M.D., 1978–1993

### Editorial Staff

#### Executive Editor

Michael D. Roy

#### Senior Editors

John J. Guardiano, Ph.D.

Jane Weaver

#### Production Manager

Susan Westrate

#### Assistant Editor

Angela Moore

#### Online Content Manager

Michael Pogachar

#### Editorial Support Services Manager

Heidi Koch

#### Editorial Assistant

Linda LaCour

#### Editorial Assistant/ Permissions Coordinator

Efrem Tuquabo

#### Spanish Content Manager

Sergi Casals, M.A.

#### Assistants to the Editors

Lois Lilienthal

Laura English

Rachel Hogg

Russell A. Scholl

### Interim Publisher

John McDuffie

## PERSPECTIVES

### EDITORIALS

#### 1131 Frontal Lobe Moderators and Mediators of Response to Exposure Therapy in PTSD

*Thomas C. Neylan, M.D.*

#### 1134 Epigenetic Programming: A Putative Neurobiological Mechanism Linking Childhood Maltreatment and Risk for Adult Psychopathology

*Brandon C. McKinney, M.D., Ph.D.*

#### 1137 BDNF, 5-HT, and Anxiety: Identification of a Critical Periadolescent Developmental Period

*Ronald S. Duman, Ph.D.*

#### 1140 2017 in Review

*The Editors*

### INTROSPECTIONS

#### 1144 The War on Terror: Is There Ever Room for Compassion?

*Omar Ahmed Reda, M.D.*

### CLINICAL CASE CONFERENCE

#### 1146 Altered Sensory Phenomena Experienced in Bipolar Disorder

*Gordon Parker, M.D., Ph.D., et al.* CME • AUDIO

**Clinical Guidance:** Altered sensory experiences are common in both bipolar I and bipolar II disorder, but patients rarely disclose them spontaneously. Alterations during hypomanic and manic states usually involve heightened sensory acuity, whereas changes during depressive episodes are generally characterized by sensory dampening.

### PERSPECTIVES IN GLOBAL MENTAL HEALTH

#### 1151 Gender Minority Stress, Depression, and Anxiety in a Transgender High School Student

*Robert D. Davies, M.D., Barbara Kessel, D.O.*

**Clinical Guidance:** Stress and psychiatric morbidity in transgender individuals are mitigated by identity affirmation by the patient's family and the community. Lack of bathroom access affirming an individual's gender identity can become a trigger for mood and anxiety symptoms.

### IMAGES IN PSYCHIATRY

#### 1153 Joan of Arc—Hearing Voices

*Barbara Schildkrout, M.D.*

### REVIEWS AND OVERVIEWS

#### 1155 Transgender Research in the 21st Century: A Selective Critical Review From a Neurocognitive Perspective

*Sven C. Mueller, Ph.D., et al.* CME • AUDIO

**Clinical Guidance:** Mental health in transgender individuals often improves after successful transition to the preferred gender. Mood disorders, anxiety, and suicidality risk are especially common before transition. Some transgender men with gender dysphoria also have subthreshold autistic traits.

## ARTICLES

**1163 PTSD Psychotherapy Outcome Predicted by Brain Activation During Emotional Reactivity and Regulation**

Gregory A. Fozzo, Ph.D., et al. EDITORIAL • AUDIO • VIDEO

The degree to which baseline prefrontal resources are spontaneously engaged when superficially processing threat and mitigating emotional interference predicts response to exposure therapy in patients with PTSD.

**1175 Selective Effects of Psychotherapy on Frontopolar Cortical Function in PTSD**

Gregory A. Fozzo, Ph.D., et al. EDITORIAL • AUDIO • VIDEO

Improvements in hyperarousal and psychological well-being following exposure therapy are associated with increased frontopolar activation during regulation of negative affect in patients with PTSD. Connectivity with the ventromedial prefrontal cortex/ventral striatum is also enhanced.

**1185 Association of a History of Child Abuse With Impaired Myelination in the Anterior Cingulate Cortex: Convergent Epigenetic, Transcriptional, and Morphological Evidence**

Pierre-Eric Lutz, M.D., Ph.D., et al. EDITORIAL

Depressed adults who die by suicide and have a history of child abuse have decreased expression of myelin-related genes in the cingulate cortex, suggesting impairment in oligodendrocyte function. This global down-regulation is absent in depressed suicide completers with no history of child abuse.

**1195 Efficacy and Safety of MIN-101: A 12-Week Randomized, Double-Blind, Placebo-Controlled Trial of a New Drug in Development for the Treatment of Negative Symptoms in Schizophrenia**

Michael Davidson, M.D., et al. AUDIO

A novel compound with affinities for sigma-2 and 5-HT<sub>2A</sub> receptors, but without direct dopamine affinities, improves negative symptoms in schizophrenia. At higher dosage, there are also effects on total symptoms, depression, and global improvement and severity.

**1203 Effect of Early-Life Fluoxetine on Anxiety-Like Behaviors in BDNF Val66Met Mice**

Iva Dincheva, Ph.D., et al. EDITORIAL

Fluoxetine administered during a sensitive periadolescent period to mice genetically engineered to display anxiety-like behaviors decreases those behaviors in adulthood.

**1214 The Role of Intrinsic Brain Functional Connectivity in Vulnerability and Resilience to Bipolar Disorder**

Gaelle E. Doucet, Ph.D., et al. CME • AUDIO

Patients with bipolar disorder and their unaffected siblings have less cohesiveness of the sensorimotor brain network than healthy volunteers. Patients and siblings differ in integration of the default mode network: patients have reduced integration, but siblings have enhanced integration, suggesting its role in their resilience.

## COMMUNICATIONS AND UPDATES

## LETTERS TO THE EDITOR

**1223 Firearms Policy and Suicide Prevention**

Jeffrey C. Sung, M.D.

**1223 Facilitating Temporary, Safe Firearms Restrictions Among Individuals at High Risk of Suicide: Response to Sung**

Mark Olfson, M.D., M.P.H., et al.

**1224 Disability Enrollment in a Community-Based Coordinated Specialty Care Program**

Jennifer Humensky, Ph.D., et al.

## BOOK FORUM

### 1226 The Treatment of Bipolar Disorder: Integrative Clinical Strategies and Future Directions

Robert Freedman, M.D.

### 1226 Physician Mental Health and Well-Being: Research and Practice

Richard F. Summers, M.D.

## OTHER ITEMS OF INTEREST

### 1225 Correction

### 1228 Reviewers for *The American Journal of Psychiatry*

### 1233 Continuing Medical Education

### A6 Chairpersons of APA Councils, Committees, and Task Forces

### A14 Subscription and Business Information

**Cover:** Sven Mueller and colleagues (p. 1155) examine research trends in the transgender community and review the literature—and gaps in the literature—about transgender issues, including the effects of hormonal therapy. [Image: Mix3r and Stephen Marques, Shutterstock.com]

Article content that addresses **Core Competencies**, defined by the Accreditation Council of Graduate Medical Education and the American Board of Medical Specialties, is indicated by the following symbols:

-  Professionalism
-  Patient Care and Procedural Skills
-  Medical Knowledge
-  Practice-Based Learning and Improvement
-  Interpersonal and Communication Skills
-  Systems-Based Practice.

More information is available at <http://www.abms.org/board-certification/a-trusted-credential/based-on-core-competencies/>

### La Tabla de Contenidos de Este Número Está Disponible en Español

*(This issue's Table of Contents are available in Spanish)  
(Abstracts are also available in Spanish)*

Translation presented in collaboration with the Office of Global Health, Rutgers-Robert Wood Johnson Medical School

Support for this effort provided by ACTA Colombia.

#### Translation courtesy of

**Sergi Casals, M.A.**

Garuna, Medellín, Colombia ([www.garunaeditors.com](http://www.garunaeditors.com))

**Carlos Lopez Jaramillo, M.D.**

Universidad de Antioquia, Medellín, Colombia

**Javier I. Escobar, M.D., M.Sc.**

Rutgers-Robert Wood Johnson Medical School

**AUDIO** Highlighted in AJP Audio, a downloadable .mp3 file available at [ajp.psychiatryonline.org](http://ajp.psychiatryonline.org)

**CME** A course covering the content of this article is available online for paid subscribers to the AJP CME Course program

**EDITORIAL** Discussed in one of the issue's editorials

**VIDEO** Highlighted online by Deputy Editor Daniel S. Pine, M.D.

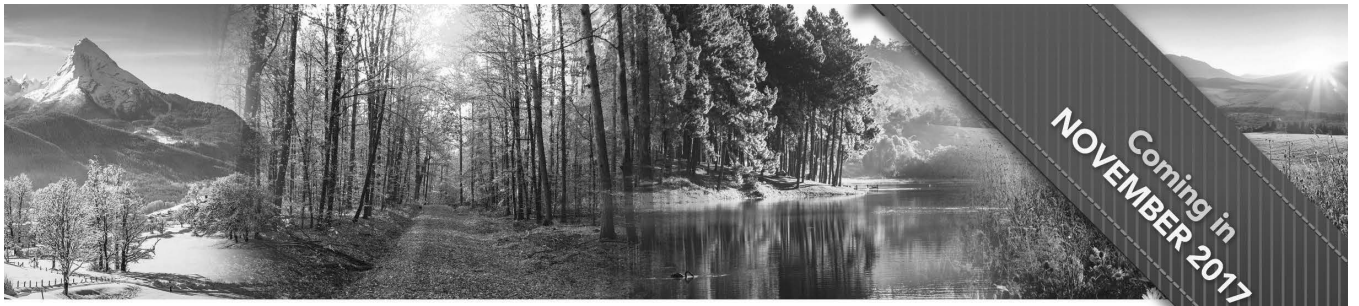

# ORTIZ | PVAT™

ORTIZ PICTURE VOCABULARY  
ACQUISITION TEST™

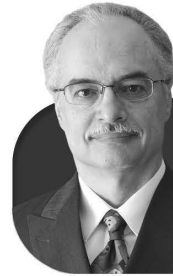

From Author  
**Samuel O. Ortiz,  
Ph.D.**

**Coming Fall 2017**

## ***Fair – Accurate – Digital***

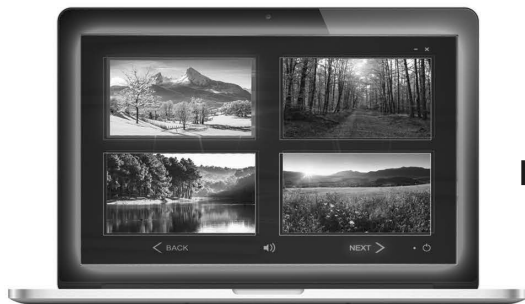

A new fully *digital* receptive test that provides a *fair* and *accurate* assessment of receptive language ability

- ⊕ ***Easy, visually engaging, and standardized administration***
- ⊕ ***Can be used with any child or youth no matter what their first language is***
- ⊕ ***User-friendly reports included to make assessment interpretation fast and clear***
- ⊕ ***Unique dual norms for both English speakers and English learners***

**MHS®**  
ASSESSMENTS

[MHS.com/OrtizPVAT](http://MHS.com/OrtizPVAT)

# THE AMERICAN PSYCHIATRIC ASSOCIATION

1000 Wilson Blvd., Suite 1825, Arlington, VA 22209-3901  
(888) 357-7924 (toll-free inside the U.S. and Canada) / (703) 907-7300  
web site: [www.psychiatry.org](http://www.psychiatry.org) • e-mail: [apa@psych.org](mailto:apa@psych.org)

## Chairpersons of Councils, Committees, and Task Forces

### Standing Committees

|                             |                               |
|-----------------------------|-------------------------------|
| <b>Bylaws</b>               | Esperanza Diaz, M.D.          |
| <b>Elections</b>            | Barry K. Herman, M.D.         |
| <b>Ethics</b>               | Ezra Griffith, M.D.           |
| <b>Finance and Budget</b>   | Alan F. Schatzberg, M.D.      |
| <i>Audit</i>                | Bruce J. Schwartz, M.D.       |
| <i>Investment Oversight</i> | David Fassler, M.D.           |
| <b>Joint Reference</b>      | Altha J. Stewart, M.D.        |
| <b>Membership</b>           | Rahn K. Bailey, M.D.          |
| <b>Nominating</b>           | Maria A. Oquendo, M.D., Ph.D. |
| <b>Tellers</b>              | Jose Vito, M.D.               |

### Non-Standing Committee

|                             |                              |
|-----------------------------|------------------------------|
| <b>Conflict of Interest</b> | Philip R. Muskin, M.D., M.A. |
|-----------------------------|------------------------------|

### Councils

#### Council on Addiction Psychiatry

Andrew J. Saxon, M.D.

#### Council on Advocacy and Government Relations

Patrick S. Runnels, M.D.

*Advocacy and Litigation Funding*

Bhasker J. Dave, M.D.

#### Council on Children, Adolescents, and Their Families

Joseph V. Penn, M.D.

#### Council on Communications

Christopher A. (Drew) Ramsey, M.D.

#### Council on Geriatric Psychiatry

Robert P. Roca, M.D.

#### Council on Healthcare Systems and Financing

Harsh K. Trivedi, M.D.

*Integrated Care*

Lori E. Raney, M.D.

*Reimbursement for Psychiatric Care*

Laurence Miller, M.D.

*RBRVS, Codes and Reimbursement*

Gregory G. Harris, M.D.

*Telepsychiatry*

James H. Shore, M.D.

#### Council on International Psychiatry

Bernardo Ng, M.D.

#### Council on Medical Education and Lifelong Learning

Mark H. Rapaport, M.D.

*Scientific Program*

Linda Worley, M.D.

*Vestmark Award Committee*

Lowell D. Tong, M.D.

#### Council on Minority Mental Health and Health Disparities

Christina V. Mangurian, M.D.

#### Council on Psychiatry and Law

Debra A. Pinals, M.D.

*Judicial Action*

Marvin S. Swartz, M.D.

#### Council on Psychosomatic Medicine (Consultation Liaison Psychiatry)

David F. Gitlin, M.D.

#### Council on Quality Care

Grayson Norquist, M.D.

*Mental Health Information Technology*

Brent Nelson, M.D.

*Performance Measures*

Karen Pierce, M.D.

*Practice Guidelines*

Michael J. Vergare, M.D.

#### Council on Research

Dwight L. Evans, M.D.

*Psychiatric Dimensions of Disasters*

Robert J. Ursano, M.D.



# The Residents' JOURNAL

The American Journal of  
**Psychiatry**  
 Residents' Journal

November 2017                      Volume 12                      Issue 11

Inside

- 2 **The Supreme Court, Child Abuse, and the Role of the State**  
 Shelley Co, D.O.  
*Demonstrating DeShaney v. Winnebago County Department of Social Services as a precedent.*
- 4 **Psychiatric Comorbidities With Cyclic Vomiting Syndrome**  
 Ramkrishna Makani, M.D., M.P.H.  
 Tapan Parikh, M.D., M.P.H.  
*Assessing anxiety, depression, and symptom management in patients with this disorder.*
- 7 **Transgender Patient Care on the Inpatient Psychiatric Unit**  
 Courtney Saw, M.D.  
*Emphasizing the importance of a therapeutic environment.*
- 9 **An Interview With Forensic Psychiatrist Joseph Browning, M.D.**  
 Conducted by Oliver Glass, M.D.
- 11 **Amy (2015): Getting to Know the Girl We All Knew**  
 Reviewed by Thomas Pyo, M.D.
- 12 **Residents' Resources**
- 13 **Author Information and Upcoming Themes**



© Shutterstock.com

|                                                                                                                                                                                                                                                                                     |                                                                                                                                                                                         |                                                                                                                                                                                                                                                                                                                                                                            |
|-------------------------------------------------------------------------------------------------------------------------------------------------------------------------------------------------------------------------------------------------------------------------------------|-----------------------------------------------------------------------------------------------------------------------------------------------------------------------------------------|----------------------------------------------------------------------------------------------------------------------------------------------------------------------------------------------------------------------------------------------------------------------------------------------------------------------------------------------------------------------------|
| <p><b>ASSOCIATE EDITORS</b><br/>         Erin Fulchiero, M.D.<br/>         Helena Winston, M.D.</p> <p><b>MEDIA EDITOR</b><br/>         Shawn E. McNeil, M.D.</p> <p><b>CULTURE EDITOR</b><br/>         Michelle Liu, M.D.</p> <p><b>STAFF EDITOR</b><br/>         Angela Moore</p> | <p><b>EDITOR-IN-CHIEF</b><br/>         Rachel Katz, M.D.</p> <p><b>SENIOR DEPUTY EDITOR</b><br/>         Oliver Glass, M.D.</p> <p><b>DEPUTY EDITOR</b><br/>         Anna Kim, M.D.</p> | <p><b>EDITORS EMERITI</b><br/>         Katherine Pier, M.D.<br/>         Rajiv Radhakrishnan, M.B.B.S., M.D.<br/>         Misty Richards, M.D., M.S.<br/>         Arshya Vahabzadeh, M.D.<br/>         Monifa Seawall, M.D.<br/>         Sarah M. Fayad, M.D.<br/>         Joseph M. Cerimele, M.D.<br/>         Molly McVoy, M.D.<br/>         Sarah B. Johnson, M.D.</p> |
|-------------------------------------------------------------------------------------------------------------------------------------------------------------------------------------------------------------------------------------------------------------------------------------|-----------------------------------------------------------------------------------------------------------------------------------------------------------------------------------------|----------------------------------------------------------------------------------------------------------------------------------------------------------------------------------------------------------------------------------------------------------------------------------------------------------------------------------------------------------------------------|

**Editor-in-Chief**  
 Rachel Katz, M.D.

**Senior Deputy Editor**  
 Oliver Glass, M.D.

**Deputy Editor**  
 Anna Kim, M.D.

**Associate Editors**  
 Erin Fulchiero, M.D.  
 Helena Winston, M.D.

The *Residents' Journal*, the largest and most robust resident-led journal in the house of medicine, is an e-publication that serves as a forum to share your ideas and experiences in training, clinical practice, research, and careers with your colleagues.

To submit a manuscript, please visit [mc.manuscriptcentral.com/appi-ajp](http://mc.manuscriptcentral.com/appi-ajp) and select a manuscript type for AJP Residents' Journal. You may submit a commentary (500 words), book review (500 words), history of psychiatry (500 words), clinical case conference (1,250 words), review article (1,500 words), treatment in psychiatry article (1,500 words), research article (1,250 words), drug review (1,500 words), or letter to the editor (250 words).

If you are interested in serving as a Guest Section Editor for the *Residents' Journal*, please send your CV, and your ideas for topics, to the Editor-in-Chief ([rachel.katz@yale.edu](mailto:rachel.katz@yale.edu)).

To access the complete Residents' Journal archives, visit [ajp.psychiatryonline.org/loi/ajp-rj](http://ajp.psychiatryonline.org/loi/ajp-rj)



# Go Online

Visit [ajp.psychiatryonline.org](http://ajp.psychiatryonline.org) for these features!

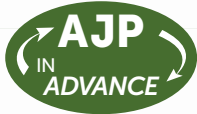

## AJP in Advance

*Discover the latest research advances before they appear in print*

### Tracking Brain Development and Dimensional Psychiatric Symptoms in Children: A Longitudinal Population-Based Neuroimaging Study

Higher scores for externalizing and internalizing symptoms at age 6 predicted smaller increases in subcortical gray matter volume and global fractional anisotropy by age 10 in a population-based cohort. Surprisingly, baseline gray and white matter measures were not related to symptom changes over time.

### Increased Risk of Smoking in Female Adolescents Who Had Childhood ADHD

The association of more severe childhood ADHD symptoms with heavier smoking in adolescence is stronger for female adolescents than for males. Inattention appears to have a causal effect on smoking in girls, whereas hyperactivity-impulsivity appears primarily noncausal.

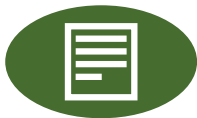

## AJP CME

*Earn CME credit: 3 courses per issue*

This month's courses appear on pages 1233–1236. Each short course is based on one article in this issue and can earn up to 1 *AMA PRA Category 1 Credit™*. CME credit is issued only **online**, and a paid subscription to AJP's CME course program is required.

Visit [psychiatryonline.org/cme](http://psychiatryonline.org/cme) and click on the "American Journal of Psychiatry" tab.

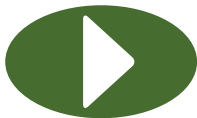

## AJP Multimedia

*Access Audio or Video for highlights of each issue*

In AJP Audio this month, Executive Editor Michael Roy discusses brain function and psychotherapy outcomes in patients with PTSD, transgender research from a neurocognitive angle, research results of a new drug for schizophrenia, and characteristics of resilience in bipolar disorder and how individuals who are bipolar experience the world.

In this month's video, Deputy Editor Daniel S. Pine, M.D., discusses the articles "PTSD Psychotherapy Outcome Predicted by Brain Activation During Emotional Reactivity and Regulation" and "Selective Effects of Psychotherapy on Frontopolar Cortical Function in PTSD."

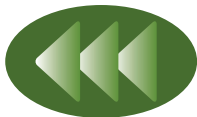

## History of Psychiatry

*Revisit the field's rich history through the pages of AJP*

### 50 years ago this month: Special Section—"History of Psychiatry"

The December 1967 issue contains a variety of articles related to the history of psychiatry, including notable contributions by Dr. Garfield Tourney ("A History of Therapeutic Fashions in Psychiatry, 1800–1966") and Dr. George Rosen ("Emotion and Sensibility in Ages of Anxiety: A Comparative Historical Review").

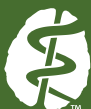

Source: https://ajp.psychiatryonline.org/doi/suppl/10.1176/ajp.2017.174.issue-12/suppl_file/front.pdf
