## PERSPECTIVAS

### EDITORIALES

- 1131 Moderadores y mediadores en el lóbulo frontal de la respuesta a la terapia de exposición en TEPT**  
*Thomas C. Neylan, M.D.*
- 1134 Programación epigenética: Un mecanismo putativo neurobiológico que relaciona el maltrato infantil con el riesgo de psicopatología en la edad adulta**  
*Brandon C. McKinney, M.D., Ph.D.*
- 1137 FNDC, 5-HT y ansiedad: identificación del período crítico de desarrollo periadolescente**  
*Ronald S. Duman, Ph.D.*
- 1140 2017 en perspectiva**  
*[The Editors]*

### INTROSPECCIÓN

- 1144 La guerra al terror: ¿Hay lugar en algún momento para la compasión?**  
*Omar Ahmed Reda, M.D.*

### CONFERENCIA DE CASO CLÍNICO

- 1146 Fenómenos sensoriales alterados experimentados en el trastorno bipolar**  
*Gordon Parker, M.D., Ph.D., et al.* **EMC • AUDIO • GUÍAS CLÍNICAS**

### PERSPECTIVAS EN SALUD MENTAL GLOBAL

- 1151 Estrés, depresión y ansiedad por minoría de género en un estudiante transgénero de secundaria**  
*Robert D. Davies, M.D., Barbara Kessel, D.O.* **GUÍAS CLÍNICAS**

### IMÁGENES EN PSIQUIATRÍA

- 1153 Juana de Arco—Oyendo voces**  
*Barbara Schildkrout, M.D.*

### REVISIÓN Y RESEÑAS

- 1155 Investigación en transgénero en el siglo 21: Una revisión crítica selectiva desde una perspectiva neurocognitiva**  
*Sven C. Mueller, Ph.D., et al.* **EMC • AUDIO • GUÍAS CLÍNICAS**

## NUEVAS INVESTIGACIONES

### ARTÍCULOS

- 1163 Resultado de la psicoterapia para TEPT, se predice por la activación cerebral durante la regulación y reacción emocionales**  
*Gregory A. Fonzo, Ph.D., et al.* **EDITORIALE • AUDIO • VIDEO**
- 1175 Efectos selectivos de la psicoterapia en la función cortical frontopolar en TEPT**  
*Gregory A. Fonzo, Ph.D., et al.* **EDITORIALE • AUDIO • VIDEO**
- 1185 Asociación de un historial de maltrato infantil a la mielinización deteriorada en la corteza cingulada anterior: Evidencia epigenética, transcripcional y morfológica convergente**  
*Pierre-Eric Lutz, M.D., Ph.D., et al.* **EDITORIALE**
- 1195 Eficacia y seguridad del MIN-101: Un ensayo de 12 semanas, aleatorizado, doble ciego y controlado con placebo, de un nuevo medicamento en desarrollo para el tratamiento de los síntomas negativos en esquizofrenia**  
*Michael Davidson, M.D., et al.* **AUDIO**

**1203 Efecto de la fluoxetina en edad temprana en los comportamientos tipo ansiedad en ratones FNDC Val66Met**

Iva Dincheva, Ph.D., et al. **EDITORIALE**

**1214 El papel de la conectividad funcional cerebral intrínseca en la vulnerabilidad y resiliencia al trastorno bipolar**

Gaëlle E. Doucet, Ph.D., et al. **EMC • AUDIO**

**COMUNICADOS Y ACTUALIZACIONES**

**CARTAS AL EDITOR**

**1223 Política de armas y prevención del suicidio**

Jeffrey C. Sung, M.D.

**1223 Facilitar restricciones temporales y seguras de armas en individuos con alto riesgo de suicidio: Respuesta a Sung**

Mark Olsson, M.D., M.P.H., et al.

**1224 Registro de incapacidad en un programa de atención de especialidad coordinado basado en la comunidad**

Jennifer Humensky, Ph.D., et al.

**RESEÑAS BIBLIOGRÁFICAS**

**1226 The Treatment of Bipolar Disorder: Integrative Clinical Strategies and Future Directions [El tratamiento el trastorno bipolar: Estrategias clínicas integradoras y direcciones futuras]**

Robert Freedman, M.D.

**1226 Physician Mental Health and Well-Being: Research and Practice**

Richard F. Summers, M.D.

**OTROS TEMAS DE INTERÉS**

**1225 [Correction]**

**1228 [Reviewers for *The American Journal of Psychiatry*]**

**1233 Educación Médica Continuada**

**Cubierta:** [Sven Mueller and colleagues (p. 1155) examine research trends in the transgender community and review the literature—and gaps in the literature—about transgender issues, including the effects of hormonal therapy. (Image: Mix3r and Stephen Marques, Shutterstock.com)]

Article content that addresses **Core Competencies**, defined by the Accreditation Council of Graduate Medical Education and the American Board of Medical Specialties, is indicated by the following symbols:

- |                                                                                                                            |                                                                                                                             |
|----------------------------------------------------------------------------------------------------------------------------|-----------------------------------------------------------------------------------------------------------------------------|
|  Professionalism                        |  Patient Care and Procedural Skills      |
|  Medical Knowledge                      |  Practice-Based Learning and Improvement |
|  Interpersonal and Communication Skills |  Systems-Based Practice.                 |

More information is available at [www.abms.org/board-certification/a-trusted-credential/based-on-core-competencies/](http://www.abms.org/board-certification/a-trusted-credential/based-on-core-competencies/)

**La Tabla de Contenidos y resúmenes de Este Número Está Disponible en Español**

(This issue's Table of Contents and abstracts are available in Spanish)

Translation presented in collaboration with the Office of Global Health, Rutgers-Robert Wood Johnson Medical School

Support for this effort provided by ACTA Colombia.

**Translation courtesy of**

**Sergi Casals, M.A.**, Garuna, Medellín, Colombia ([www.garunaeditors.com](http://www.garunaeditors.com))

**Carlos Lopez Jaramillo, M.D.**, Universidad de Antioquia, Medellín, Colombia

**Javier I. Escobar, M.D., M.Sc.**, Rutgers-Robert Wood Johnson Medical School

**AUDIO** Highlighted in AJP Audio, a downloadable .mp3 file available at [ajp.psychiatryonline.org](http://ajp.psychiatryonline.org)

**EMC** A course covering the content of this article is available online for paid subscribers to the AJP EMC Course program

**EDITORIAL** Discussed in one of the issue's editorials

**GUÍAS CLÍNICAS** Clinical Guidance provided on the English table of contents

**VIDEO** Highlighted online by Deputy Editor Daniel S. Pine, M.D.

## Investigación en transgénero en el siglo 21: Una revisión crítica selectiva desde una perspectiva neurocognitiva

Sven C. Mueller, Ph.D., Griet De Cuypere, M.D., Ph.D., Guy T'Sjoen, M.D.

La disforia de género describe el malestar psicológico causado por la identificación con el sexo opuesto al sexo asignado al nacer. En años recientes se ha progresado mucho en la caracterización de las necesidades de las personas transgénero que quieren cambiarse a su sexo preferido, lo que ayuda a optimizar la atención. Esta revisión crítica de la literatura examina sus problemas de salud mental comunes, varios factores de riesgo de comorbilidad psiquiátrica e investigaciones actuales sobre la neurobiología subyacente. Las tasas de prevalencia de las personas que se identifican como transgénero y que buscan ayuda con la transición han aumentado drásticamente desde el año 2000 en los países occidentales; el estimado actual en los Estados Unidos es 0,6%. Frecuentemente se observa ansiedad y depresión antes y después de la transición, aunque después estas disminuyen. Investigaciones recientes han identificado rasgos autistas en algunas personas transgénero. Cuarenta por ciento de las personas transgénero

tienen tendencias suicidas y las tasas de comportamiento de autolesión y suicidio son marcadamente más altas que en la población general. Los factores individuales que contribuyen a la salud mental en las personas transgénero incluyen las actitudes de la comunidad, la aceptación social y el atractivo físico en la post-transición. Neurobiológicamente, mientras que los datos de IRM estructural hasta el momento son inconsistentes, la evidencia de IRM funcional en personas transgénero sugiere que hay cambios en algunas áreas cerebrales relacionadas con el olfato y la percepción de la voz, consistentes con la identificación sexual, pero de este aspecto, tampoco se tiene todavía claridad definitiva. Los especialistas clínicos de salud mental, junto con otros especialistas de la salud, juegan un papel cada vez más importante en la evaluación de la disforia de género en personas transgénero.

*(Am J Psychiatry 2017; 174:1155–1162)*

## Resultado de la psicoterapia para TEPT se predice por la activación cerebral durante la regulación y reacción emocionales

Gregory A. Fonzo, Ph.D., Madeleine S. Goodkind, Ph.D., Desmond J. Oathes, Ph.D., Yevgeniya V. Zaiko, B.A., Meredith Harvey, B.A., Kathy K. Peng, M.A., M. Elizabeth Weiss, Ph.D., Allison L. Thompson, Ph.D., Sanno E. Zack, Ph.D., Steven E. Lindley, M.D., Ph.D., Bruce A. Arnow, Ph.D., Booil Jo, Ph.D., James J. Gross, Ph.D., Barbara O. Rothbaum, Ph.D., Amit Etkin, M.D., Ph.D.

**Objetivo:** La terapia de exposición es un tratamiento efectivo para el trastorno por estrés postraumático (TEPT), pero muchos pacientes no responden. Las funciones cerebrales que regulan el resultado del tratamiento no están bien caracterizadas. Los autores examinaron sistemas cerebrales importantes para la reacción y la regulación emocionales, constructos considerados como centrales del TEPT y de los efectos de la terapia de exposición, para identificar los rasgos funcionales de los individuos que tienen mayor probabilidad de beneficiarse del tratamiento.

**Método:** Se hizo IRM funcional (IRMf) a individuos con TEPT mientras completaban tres tareas que evalúan la reacción y la regulación emocionales. Posteriormente los participantes fueron asignados aleatoriamente a un tratamiento de exposición prolongado (N=36) o a una lista de espera (N=30). A un subgrupo aleatorio de la muestra de exposición prolongada (N=17) se les hizo estimulación magnética transcraneal (EMT) con un único pulso, concurrente con IRMf para examinar si los patrones de activación predictivos reflejan influencia causal en los circuitos. Se utilizó el modelo de efectos mixtos lineal acorde con el principio de intención de tratamiento, para examinar cómo la función cerebral al inicio del estudio

moderaba el efecto del tratamiento en los síntomas de TEPT.

**Resultados:** Al inicio del estudio, los individuos con una mayor reducción de los síntomas relacionada con el tratamiento (en comparación con los individuos del grupo de la lista de espera) demostraron 1) mayor activación prefrontal dorsal y 2) menor activación de la amígdala izquierda, ambas durante la reacción a la emoción; 3) mejor inhibición de la amígdala izquierda inducida por pulsos únicos de EMT a la corteza prefrontal dorsolateral derecha; y 4) mayor activación estriatal prefrontal ventromedial/ventral durante la regulación de conflictos emocionales. La activación relacionada con la revaloración no fue un moderador significativo del efecto del tratamiento.

**Conclusiones:** La capacidad de beneficiarse de la exposición prolongada en TEPT está determinada por el grado hasta el que los recursos prefrontales se implican espontáneamente al procesar superficialmente las amenazas y al mitigar de forma adaptativa las interferencias emocionales, pero no al reducir deliberadamente la emocionalidad negativa.

(*Am J Psychiatry* 2017; 174:1163–1174)

## Efectos selectivos de la psicoterapia en la función cortical frontopolar en TEPT

Gregory A. Fonzo, Ph.D., Madeleine S. Goodkind, Ph.D., Desmond J. Oathes, Ph.D., Yevgeniya V. Zaiko, B.A., Meredith Harvey, B.A., Kathy K. Peng, M.A., M. Elizabeth Weiss, Ph.D., Allison L. Thompson, Ph.D., Sanno E. Zack, Ph.D., Colleen E. Mills-Finnerty, Ph.D., Benjamin M. Rosenber, B.A., Raleigh Edelstein, B.A., Rachael N. Wright, B.S., Carena A. Kole, B.S., Steven E. Lindley, M.D., Ph.D., Bruce A. Arnow, Ph.D., Booil Jo, Ph.D., James J. Gross, Ph.D., Barbara O. Rothbaum, Ph.D., Amit Etkin, M.D., Ph.D.

**Objetivo:** La terapia de exposición es un tratamiento efectivo para el trastorno por estrés postraumático (TEPT), pero no hay ninguna perspectiva centrada en las emociones de cómo la psicoterapia afecta las funciones cerebrales. Los autores evaluaron los cambios en la función cerebral después de la terapia de exposición prolongada en 3 paradigmas de regulación y reacción emocionales.

**Método:** A individuos con TEPT se les hizo IRM funcional (IRMf) en estado de reposo y mientras completaban tres tareas que evaluaban la regulación y la reacción emocionales. Posteriormente los individuos fueron asignados aleatoriamente a un tratamiento de exposición prolongada (N=36) o a una lista de espera (N=30) y se les hizo otro escaneo aproximadamente 4 semanas después de la última sesión de tratamiento o de un período de espera comparable, respectivamente.

**Resultados:** Se observaron cambios específicos por el tratamiento solamente durante la revaloración cognitiva de las imágenes negativas. La psicoterapia aumentó la actividad de la corteza frontopolar lateral y la conectividad con la corteza prefrontal ventromedial/estriado ventral. Los mayores au-

mentos en la activación frontopolar se asociaron a una mejora de los síntomas de hiperactivación y el bienestar psicosocial. La corteza frontopolar también mostró una mayor variedad de cambios temporales en los patrones de señales estando en estado de reposo después del tratamiento. La estimulación magnética transcraneal concurrente con la IRMf en participantes sanos demostró que la corteza frontopolar lateral ejerce influencia descendiente en la corteza prefrontal ventromedial/el estriado ventral.

**Conclusiones:** Los cambios en la función frontopolar durante la regulación deliberada del afecto negativo es un mecanismo clave del cambio psicoterapéutico adaptativo en TEPT. Dado que la psicoterapia mejora la conectividad frontopolar con las regiones ventromediales durante la regulación de las emociones y que la corteza frontopolar ejerce influencia descendencia en las regiones ventromediales en los individuos sanos, estos hallazgos proporcionan una conceptualización novedosa de cómo funciona la psicoterapia e identifican un objetivo promisorio para la terapéutica basada en la estimulación.

(*Am J Psychiatry* 2017; 174:1175–1184)

## Asociación de un historial de maltrato infantil a la mielinización deteriorada en la corteza cingulada anterior: Evidencia epigenética, transcripcional y morfológica convergente

Pierre-Eric Lutz, M.D., Ph.D., Arnaud Tanti, Ph.D., Alicja Gasecka, Ph.D., Sarah Barnett-Burns, B.Sc., John J. Kim, B.Sc., Yi Zhou, B.Sc., Gang G. Chen, Ph.D., Marina Wakid, B.Sc., Meghan Shaw, B.Sc., Daniel Almeida, B.Sc., Marc-Aurele Chay, B.Sc., Jennie Yang, M.Sc., Vanessa Larivière, D.C.S., Marie-Noël M'Boutchou, M.Sc., Léon C. van Kempen, Ph.D., Volodymyr Yerko, Ph.D., Josée Prud'homme, B.Sc., Maria Antonietta Davoli, M.Sc., Kathryn Vaillancourt, B.Sc., Jean-François Théroux, M.Sc., Alexandre Bramoullé, M.Sc., Tie-Yuan Zhang, Ph.D., Michael J. Meaney, Ph.D., Carl Ernst, Ph.D., Daniel Côté, Ph.D., Naguib Mechawar, Ph.D., Gustavo Turecki, M.D., Ph.D.

**Objetivo:** El maltrato infantil tiene consecuencias devastadoras y perdurables que aumentan considerablemente el riesgo de resultados negativos en la salud mental durante la vida, como la depresión y el suicidio. Sin embargo, siguen sin comprenderse bien los procesos neurobiológicos subyacentes a esta vulnerabilidad aumentada. Los autores investigaron la hipótesis que las adaptaciones epigenéticas, transcripcional y celulares pueden ocurrir en la corteza cingulada anterior como una función del maltrato infantil.

**Método:** Se analizaron muestras cerebrales postmortem de sujetos humanos (N=78) y de un modelo en roedores del impacto del entorno en la etapa inicial de la vida (N=24). Las muestras humanas eran de individuos deprimidos que murieron por suicidio, con (N=27) o sin (N=25) antecedentes de maltrato infantil grave, así como de sujetos control psiquiátricamente sanos (N=26). Se investigó la metilación del ADN y la expresión genética, ambas del genoma completo, utilizando secuenciación de bisulfito y secuenciación de ARN, respectivamente. Se realizó la validación específica del tipo de célula de los sitios metilados diferencialmente después de la clasificación de células activadas por fluorescencia de núcleos de oligodendrocitos y neuronales. La expresión genética diferencial se validó utilizando tecnología NanoString.

Por último, se analizaron los oligodendrocitos y los axones mielinizados utilizando estereología y microscopía de dispersión Raman anti-Stokes.

**Resultados:** Un historial de maltrato infantil se asoció a los cambios específicos según el tipo de célula en la metilación del ADN de los genes oligodendrocitos y a un deterioro global del programa transcripcional relacionado a la mielina. Estos efectos estuvieron ausentes en los sujetos deprimidos que consumaron el suicidio sin tener antecedentes de maltrato infantil, y estuvieron altamente correlacionados con cambios en la expresión genética de la mielina observados en el modelo animal. Adicionalmente, en individuos con antecedentes de maltrato infantil se observó una reducción selectiva y significativa del grosor de las fundas de mielina alrededor de los axones de diámetro pequeño.

**Conclusiones:** Los resultados sugieren que el abuso infantil, en parte por medio de reprogramación epigenética de los oligodendrocitos, puede perturbar permanentemente la mielinización cortical, una característica fundamental de la conectividad cerebral.

(*Am J Psychiatry* 2017; 174:1185–1194)

## Eficacia y seguridad del MIN-101: Un ensayo de 12 semanas, aleatorizado, doble ciego y controlado con placebo, de un nuevo medicamento en desarrollo para el tratamiento de los síntomas negativos en esquizofrenia

Michael Davidson, M.D., Jay Saoud, Ph.D., Corinne Staner, M.D., Nadine Noel, Ph.D., Elisabeth Luthringer, R.N., Sandra Werner, Ph.D., Joseph Reilly, M.S., Jean-Yves Schaffhauser, Pharm.D., Jonathan Rabinowitz, Ph.D., Mark Weiser, M.D., Remy Luthringer, Ph.D.

**Objetivo:** Los autores evaluaron la eficacia, la seguridad y la tolerabilidad del MIN-101, un compuesto con afinidades a los receptores sigma-2 y 5-HT<sub>2A</sub> y sin afinidades directas sobre la dopamina, en comparación con el placebo en el tratamiento de los síntomas negativos en pacientes con esquizofrenia estabilizados.

**Método:** El ensayo incluyó 244 participantes que habían estado sintómicamente estables durante al menos 3 meses y obtuvieron puntuaciones de por lo menos 20 en la subescala negativa de la Escala de los Síndromes Positivo y Negativo (PANSS). Después de una abstinencia de antipsicóticos de por lo menos 5 días, los pacientes fueron asignados aleatoriamente para recibir placebo o 32 mg/día o 64 mg/día de MIN-101 durante 12 semanas. La medida primaria de resultados fue la puntuación del factor negativo en la escala PANSS (modelo de estructura pentagonal). Las medidas secundarias de resultados fueron la puntuación total en la escala PANSS y las puntuaciones en la Escala de Impresión Global Clínica (CGI), la Escala Breve de Síntomas Negativos, la Breve Evaluación de la Cognición en Esquizofrenia y la escala de Depresión de Calgary para Esquizofrenia.

**Resultados:** Se observó una diferencia significativa e la puntuación del factor negativo en la escala PANSS, alcanzando puntuaciones más bajas los grupos de 32 mg/día y de 64 mg/día de MIN-101 en comparación con el grupo de placebo (tamaños de efecto  $d=0,45$  y  $d=0,57$ , respectivamente). Efectos similares en varias de las medidas secundarias de resultados apoyan estos hallazgos, como la puntuación del síntoma negativo de la escala PANSS, o las puntuaciones total y del factor de activación, el punto de gravedad de la escala CGI, y la Escala Breve de Síntomas Negativos. No hubo diferencias significativas en la puntuación de la escala positiva PANSS entre los grupos de MIN-101 y el grupo placebo. No se observaron cambios clínicamente significativos en los signos vitales, los valores rutinarios de laboratorio, el peso, los índices metabólicos ni la puntuación en la escala de movimientos involuntarios anormales.

**Conclusiones:** Se demostró que el MIN-101 tiene eficacia estadísticamente significativa para reducir los síntomas negativos y buena tolerabilidad en pacientes esquizofrénicos estables.

(*Am J Psychiatry* 2017; 174:1195–1202)

## Efecto de la fluoxetina en edad temprana en los comportamientos tipo ansiedad en ratones FNDC Val66Met

Iva Dincheva, Ph.D., Jianmin Yang, Ph.D., Anfei Li, B.S., Tina Marinic, B.A., Helena Freilingsdorf, M.D., Chienchun Huang, B.S., B.J. Casey, Ph.D., Barbara Hempstead, M.D., Ph.D., Charles E. Glatt, M.D., Ph.D., Francis S. Lee, M.D., Ph.D., Kevin G. Bath, Ph.D., Deqiang Jing, M.D., Ph.D.

**Objetivo:** La adolescencia es una etapa del desarrollo en la que la incidencia de trastornos psiquiátricos, como los trastornos de ansiedad, alcanza su punto máximo. Los inhibidores selectivos de la recaptación de serotonina (ISRS) son la principal clase de agentes utilizados para tratar los trastornos de ansiedad. Sin embargo, sigue sin conocerse el impacto de los ISRS en el cerebro en desarrollo durante la adolescencia. Los autores evaluaron el impacto de la administración programada de ISRS en un modelo genético de roedores que muestra comportamientos tipo ansiedad elevada.

**Método:** Ratones 'knock-in' que contenían un polimorfismo de nucleótido simple, común en los humanos (Val66Met; rs6265) en el factor neurotrófico derivado del cerebro (FNDC), un factor de crecimiento implicado en el mecanismo de acción de los ISRS, fueron estudiados con base en su fenotipo establecido de comportamiento tipo ansiedad aumentada. La administración programada de fluoxetina se llevó a cabo durante uno de tres periodos de desarrollo (días postnatales 21–42, 40–61, o 60–81), abarcando la transición de la infancia a la edad adulta. Se realizaron análisis neuroquímicos y comportamentales tipo ansiedad.

**Resultados:** Identificamos un «período sensible» durante la periadolescencia (días postnatales 1–42) en el que la administración programada de fluoxetina rescató fenotipos tipo-ansiedad en ratones FNDC Val66Met en edad adulta. En comparación con los controles de la camada, los ratones FNDCMet/Met exhibieron maduración reducida de las fibras serotoninérgicas que se proyectan particularmente a la corteza prefrontal, así como expresión disminuida del factor trófico serotoninérgico S100B en el rafe dorsal. Es interesante que la inervación serotoninérgica deficiente, así como los niveles de S100B, se rescataran con la administración de fluoxetina durante la periadolescencia.

**Conclusiones:** Estos hallazgos sugieren que la administración de ISRS durante un «período sensible» en la periadolescencia conlleva efectos ansiolíticos duraderos en un modelo genético de ratones de comportamientos tipo ansiedad elevada. Estos efectos persistentes resaltan el papel del FNDC en la maduración del sistema de la serotonina y la capacidad de potenciar su desarrollo a través de la intervención farmacológica.

*(Am J Psychiatry 2017; 174:1203–1213)*



# El papel de la conectividad funcional cerebral intrínseca en la vulnerabilidad y resiliencia al trastorno bipolar

Gaëlle E. Doucet, Ph.D., Danielle S. Bassett, Ph.D., Nailin Yao, Ph.D., David C. Glahn, Ph.D., Sophia Frangou, M.D., Ph.D.

**Objetivo:** El trastorno bipolar es un trastorno heredable, caracterizado por la desregulación del estado de ánimo asociada a la desconectividad funcional del cerebro. Investigaciones anteriores se han centrado en la detección de desconectividad asociada a la enfermedad y al riesgo en individuos con trastorno bipolar y sus familiares de primer grado. El presente estudio busca identificar características de conectividad cerebral adaptativa asociadas a la resiliencia, definida aquí como la evitación de la enfermedad o el inicio retrasado de la enfermedad en hermanos no afectados de pacientes con trastorno bipolar.

**Método:** Se utilizaron modelos teóricos de gráficos para examinar la topología de las redes cerebrales regionales y globales en datos de IRM funcional en estado de reposo corregida por movimiento, de 78 pacientes con trastorno bipolar, 64 hermanos y hermanas no afectados y 41 voluntarios sanos.

**Resultados:** Las propiedades de la red global se preservaron en los pacientes y sus hermanos, mientras que ambos grupos mostraron reducciones en la cohesión de la red senso-

motora. En el grupo de pacientes, estas anomalías de la red sensorimotora se relacionaron con la integración reducida de las regiones básicas de la red neuronal por defecto en la corteza ventromedial y el hipocampo. En cambio, la integración de la red neuronal por defecto aumentó en el grupo de los hermanos en comparación tanto con el grupo de pacientes como con el de voluntarios sanos.

**Conclusiones:** Los autores encontraron que la vulnerabilidad al trastorno bipolar relacionada con los rasgos estaba asociada a una cohesión reducida en el estado de reposo de la red sensorimotora en pacientes con trastorno bipolar. Sin embargo, la integración de la red neuronal por defecto surgió como una característica esencial que diferencia la expresión y la resiliencia de la enfermedad entre los pacientes y sus hermanos. Esto es un indicador de la presencia de mecanismos neuronales que pueden favorecer la resiliencia, o por lo menos retrasar el inicio de la enfermedad.

(*Am J Psychiatry* 2017; 174:1214–1222)
